# Supplementary material
Source: PubMed Central journal article supplement (PMC2934938)
Supplement: 00166.2010_1.pdf [file 00166.2010_1.pdf]

Key and Beshel, Beta oscillations in 2-alternative choice

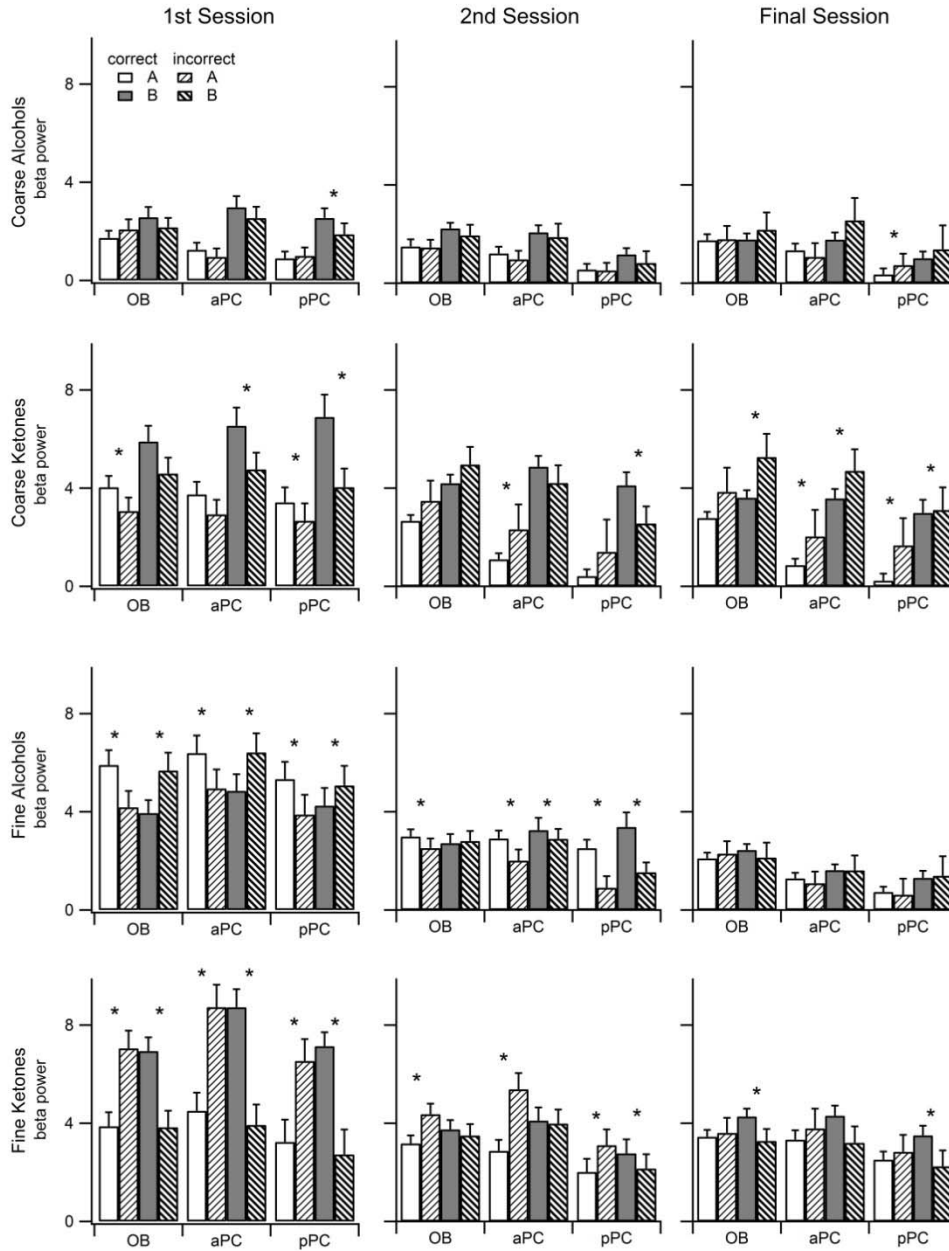

**Figure S1. Evolution of beta power with learning.** The left column shows the mean beta power ratio data from Figure 5 for correct and incorrect responses. Column 2 shows the same analysis on the second session with each of the odor pairs across the four rats (one session each for coarse alcohols, coarse ketones and fine alcohols are the final sessions for those odor pairs in individual rats). Column 3 shows the analysis for the final sessions (one session is repeated from column 2 within these means for each of coarse alcohols, coarse ketones and fine alcohols).
